JANUARY 2025 | VOLUME 182 | NUMBER 1

The American Journal of  
**Psychiatry**

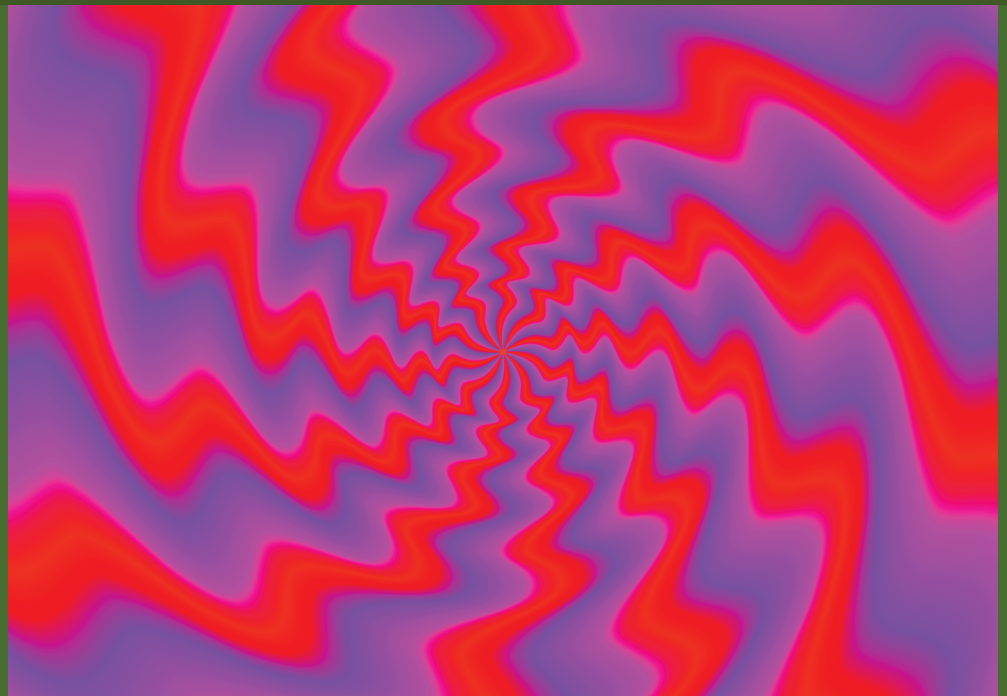

*Special issue on  
Psychedelics*

AMERICAN  
**PSYCHIATRIC**  
ASSOCIATION 

[ajp.psychiatryonline.org](http://ajp.psychiatryonline.org)
